# Supplementary material for: A predictive model of the cat cortical connectome based on cytoarchitecture and distance
Source: Springer Nature journal article supplement (doi:10.1007/s00429-014-0849-y), 2014-07-25
Supplement: MOESM1 [file 8502186]

# A Predictive Model of the Cat Cortical Connectome Based on Cytoarchitecture and Distance

Sarah F. Beul<sup>1\*</sup>, Simon Grant<sup>2</sup>, Claus C. Hilgetag<sup>1,3</sup>

<sup>1</sup> Department of Computational Neuroscience, University Medical Center Eppendorf, 20246 Hamburg, Germany

<sup>2</sup> Division of Optometry and Visual Science, Henry Wellcome Laboratories for Visual Sciences, City University London, London EC1V 0HB, UK

<sup>3</sup> Department of Health Sciences, Sargent College, Boston University, Boston MA 02215, USA

\* s.beul@uke.de

## Brain Structure and Function

### Online Resource 1

Table of anatomical abbreviations.

|      |                                         |
|------|-----------------------------------------|
| 1    | area 1                                  |
| 2    | area 2                                  |
| 4    | area 4                                  |
| 7    | area 7                                  |
| 17   | area 17                                 |
| 18   | area 18                                 |
| 19   | area 19                                 |
| 35   | area 35                                 |
| 36   | area 36                                 |
| 20a  | area 20a                                |
| 20b  | area 20b                                |
| 21a  | area 21a                                |
| 21b  | area 21b                                |
| 3a   | area 3a                                 |
| 3b   | area 3b                                 |
| 4g   | area 4 $\gamma$                         |
| 5al  | lateral area 5a                         |
| 5am  | medial area 5a                          |
| 5bl  | lateral area 5b                         |
| 5bm  | medial area 5b                          |
| 5m   | medial area 5                           |
| 6l   | lateral area 6                          |
| 6m   | medial area 6                           |
| AAF  | anterior auditory field                 |
| AES  | anterior ectosylvian sulcus             |
| AI   | primary auditory field                  |
| AII  | secondary auditory field                |
| ALG  | anterolateral gyrus                     |
| ALLS | anterolateral lateral suprasylvian area |
| AMLS | anteromedial lateral suprasylvian area  |

|       |                                                       |
|-------|-------------------------------------------------------|
| Amyg  | amygdala                                              |
| CGa   | anterior cingulate cortex                             |
| CGp   | posterior cingulate cortex                            |
| DLS   | dorsolateral suprasylvian area                        |
| DP    | dorsoposterior auditory field                         |
| EPP   | posterior part of the posterior ectosylvian gyrus     |
| ER    | entorhinal cortex                                     |
| Hipp  | hippocampus proper                                    |
| Ia    | agranular insula                                      |
| Ig    | granular insula                                       |
| IL    | infralimbic area                                      |
| LA    | anterior limbic cortex                                |
| P     | posterior auditory field                              |
| PFCdl | dorsolateral prefrontal cortex                        |
| PFCdm | dorsomedial prefrontal cortex                         |
| PFCr  | rostral prefrontal cortex                             |
| PFCv  | ventral prefrontal cortex                             |
| PL    | prelimbic area                                        |
| PLLS  | posterolateral lateral suprasylvian area              |
| PMLS  | posteromedial lateral suprasylvian area               |
| POA   | presylvian oculomotor area                            |
| PS    | posterior suprasylvian area                           |
| pSb   | presubiculum, parasubiculum, and postsubicular cortex |
| RS    | retrosplenial cortex                                  |
| Sb    | subiculum                                             |
| SII   | second somatosensory area                             |
| SIV   | fourth somatosensory area                             |
| SSAi  | inner (deep) suprasylvian sulcal region of area 5     |
| SSAo  | outer suprasylvian sulcal region of area 5            |
| SSF   | suprasylvian fringe                                   |
| SVA   | splenial visual area                                  |
| Tem   | temporal auditory field                               |
| V     | ventral auditory field                                |
| VLS   | ventrolateral suprasylvian area                       |
| VP    | ventroposterior auditory field                        |
